# Supplementary material for: New Insights into the Behavior of NHC-Gold Complexes in Cancer Cells
Source: MDPI journal article supplement (doi:10.3390/pharmaceutics15020466), 2023-01-31
Supplement: s1 [file s1]

Supplementary

# New insights into the behavior of NHC-Gold complexes in cancer cells

Giuseppa Augello <sup>1,\*</sup>, Antonina Azzolina <sup>1</sup>, Filomena Rossi <sup>2</sup>, Filippo Prencipe <sup>3</sup>, Giuseppe Felice Mangiatordi <sup>3</sup>, Michele Saviano <sup>4</sup>, Luisa Ronga <sup>5</sup>, Melchiorre Cervello <sup>1</sup> and Diego Tesauro <sup>2,\*</sup>

- <sup>1</sup> Institute for Biomedical Research and Innovation (IRIB) CNR, Via Ugo LaMalfa 153, 90146 Palermo, Italy
  - <sup>2</sup> Department of Pharmacy and Interuniversity Research Centre on Bioactive Peptides (CIRPeB), University of Naples “Federico II”, via Montesano 49, 80131 Naples, Italy
  - <sup>3</sup> Institute of Crystallography (IC) CNR, Via Amendola 122/O, 70126 Bari, Italy
  - <sup>4</sup> Institute of Crystallography (IC) CNR, URT Caserta, Via Vivaldi 43, 81100 Caserta, Italy
  - <sup>5</sup> E2S UPPA, CNRS, IPREM, Université de Pau et des Pays de l’Adour, 64000 Pau, France
- \* Correspondence: giuseppa.augello@irib.cnr.it (G.A.); dtesauro@unina.it (D.T.)

**Keywords:** NHC-gold(I) complexes; TrxR1 activity, antiproliferative effect, cancer cells

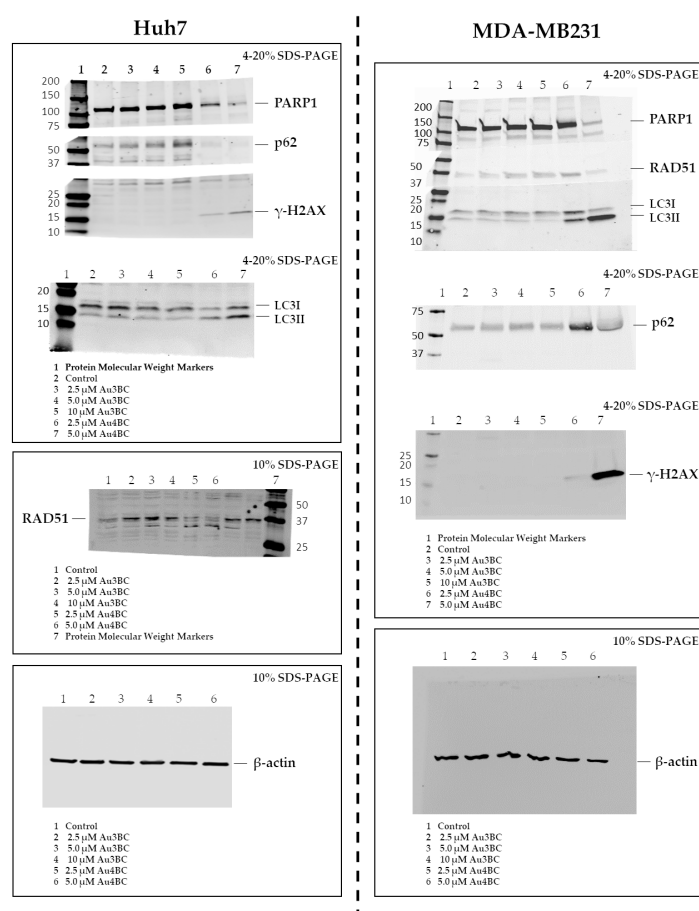

**Figure S1.** Original Western blot images.

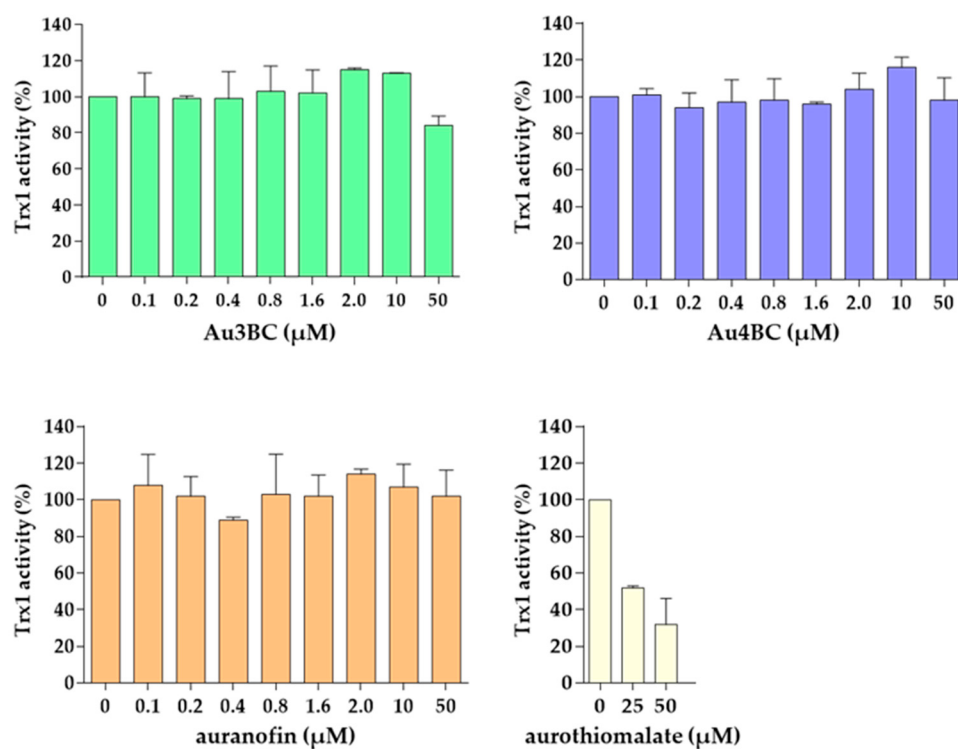

**Figure S2. Trx1 activity in vitro.** Human recombinant Trx1 was incubated with different concentrations of Au3BC, Au4BC and auranofin. Trx1 activity was assayed in presence of insulin and DTT at 25°C for 30 min. Aurothiomalate was used as Trx1 inhibitor positive control.
